# Supplementary material for: Cloud Model-Based Method for Infrared Image Thresholding
Source: Hindawi journal article supplement (doi:10.1155/2016/1571795), 2016-01-01
Supplement: f1 [file 1571795.f1.zip]

Archive with 4 entries (4 files):
- appendixA.pdf
- appendixB/Li.mp4
- appendixB/Our.mp4
- appendixB/ReadMe.txt
