# Supplementary material for: Cloud Model-Based Method for Infrared Image Thresholding
Source: Hindawi journal article supplement (doi:10.1155/2016/1571795), 2016-01-01
Supplement: f1 [file 1571795.f1.zip › appendixB/ReadMe.txt]

We apply the proposed method into infrared image target detection,as well as Li'method.

The processing steps are:
(1) segmenting the images by two methods,
(2) and generating the minimum bounding rectangle of object,
(3) then overlying the original images and converting the result image sequences into videos.

There are two result files with .mp4 file format.
'Our.mp4'================The result video of Our method 
'Li.mp4'==============The result video of Li'method
